# Supplementary material for: Ultrasound-guided corticosteroid injection for patients with carpal tunnel syndrome: a systematic review and meta-analysis of randomized controlled trials
Source: Research Square preprint supplement (doi:10.21203/rs.3.rs-125732/v1), 2020-12-18
Supplement: Supplementary file 1 [file 7cf59112787c6bec3136d7c8.docx]

| **Table 1.** Characteristics of the selected randomized controlled trials. | | | | | | | | | | |
| --- | --- | --- | --- | --- | --- | --- | --- | --- | --- | --- |
| Author, year | Corticosteroid | Intervention group (ultrasound-guided injection) | | | | Control group (landmark-guided injection) | | | Outcome measures | Follow-up duration (weeks) |
| Plane of approach | n (hands) | Mean age (SD) | Mean symptom duration (weeks) (SD) | n (hands) | Mean age (SD) | Mean symptom duration (weeks) (SD) |
| Roh et al., 201933 | single 2-mL injection that contained 1 mL of lidocaine (10 mg/mL) and 1 mL of triamcinolone acetonide (20 mg/mL) | Out-of-plane ulnar approach | 51 | 54 (35-64) (range) | 15 (3-84) (range) | 51 | 55 (37-66) (range) | 14 (3-60) (range) | BCTQ (SSS, FSS) | 24 |
| Rayegani et al., 201934 | 1 mL of triamcinolone 40 mg plus to 1 mL of lidocaine 2% | In-plane ulnar approach | 26 | 54.39 (9.3) | N/A | 27 | 54.39 (9.3) | N/A | BCTQ (SSS, FSS) and electrodiagnostic findings (SNAP, CMAP) | 10 |
| Vahdatpour et al., 201932 | methylprednisolone acetate 40 mg without local anesthetics | In-plane ulnar approach | 29 | 48.14 (9.41) | N/A | 23 | 47.61 (8.30) | N/A | BCTQ (SSS, FSS) and electrodiagnostic findings (SNAP, CMAP) | 12 |
| Chen et al., 201831 | Betamethasone 1 ml (Betamethasone 1 ml /amp, 1 ml contains betamethasone dipropionate 5 mg and betamethasone disodium phosphate 2 mg) | Out-of-plane ulnar approach | 22 | 51.09 (10.09) | 70.55 (70.61) | 17 | 51.12 (8.19) | 65.12 (63.03) | BCTQ (SSS, FSS) and electrodiagnostic findings (SNAP, SNCV, DML, CMAP) | 72 |
| Karaahmet et al., 201730 | 1 mL of betamethasone sodium phosphate (2.63 mg)/betamethasone dipropionate (6.43 mg) | In-plane ulnar approach | 15 | 59.4 (12.4) | 28.5 (30.6) Days | 16 | 61.5 (10.3) | 38.5 (40.4) Days | BCTQ (SSS, FSS) and electrodiagnostic findings (SNAP, SNCV, DML, CMAP) | 4 |
| Eslamian et al., 201729 | 40 mg of methylprednisolone without local anesthetic | In-plane ulnar approach | 30 | 54.52 (2.05) | N/A | 30 | 49.33 (1.82) | N/A | BCTQ (SSS, FSS) and electrodiagnostic findings (SNAP, SNCV, DML, CMAP) | 12 |
| Lee et al., 201428 | 1mL of 40 mg/mL triamcinolone and 1mL of 1% lidocaine | In-plane ulnar approach | 26 | 55.2 (13.2) | 8.9 (2.2) | 15 | 50.3 (9.6) | 7.6 (2.9) | BCTQ (SSS, FSS) and electrodiagnostic findings (DML, CMAP, DSL, SNAP) | 12 |
| Out-of-plane ulnar approach | 24 | 52.6 (11.60 | 9.4 (3.6) |
| Ustün et al., 201327 | 40 mg of methylprednisolone | Out-of-plane ulnar approach | 23 | 45.96 (10.49) | 16.78 (10.65) | 23 | 42.71 (11.38) | 10.19 (10.19) | BCTQ (SSS, FSS) | 12 |
| N/A, Not applicable; BCTQ, Boston Carpal Tunnel Syndrome Questionnaire; SSS, Symptom Severity Scale; FSS, Functional Status Scale; SNAP, sensory nerve action potential; CMAP, compound muscle action potential; SNCV, sensory nerve conduction velocity; DML, distal motor latency; DSL, distal sensory latency; SD, standard deviation. | | | | | | | | | | |
