# Supplementary material for: Ultrasound-guided corticosteroid injection for patients with carpal tunnel syndrome: a systematic review and meta-analysis of randomized controlled trials
Source: Research Square preprint supplement (doi:10.21203/rs.3.rs-125732/v1), 2020-12-18
Supplement: Supplementary file 1 [file 87c00601434cc80001d3f810.docx]

**Article title**

Ultrasound-guided corticosteroid injection for patients with carpal tunnel syndrome: a systematic review and meta-analysis of randomized controlled trials

**Authors and affiliations**

Fu-An Yang, MD1, *, Ya-Chu Shih, MD1, *, Jia-Pei Hong, MSc2, Chin-Wen Wu, MD2,3, Chun-De Liao, PhD2,4, and Hung-Chou Chen, MD2, 3, 5

1School of Medicine, College of Medicine, Taipei Medical University, Taipei, Taiwan

2Department of Physical Medicine and Rehabilitation, Shuang Ho Hospital, Taipei Medical University, New Taipei City, Taiwan

3Department of Physical Medicine and Rehabilitation, School of Medicine, College of Medicine, Taipei Medical University, Taipei, Taiwan

4Master Program in Long-Term Care, College of Nursing, Taipei Medical University, Taipei, Taiwan

5Center for Evidence-Based Health Care, Shuang Ho Hospital, Taipei Medical University, New Taipei City, Taiwan

*These authors contributed equally to this study

**Corresponding author**

Hung-Chou Chen, MD

Department of Physical Medicine and Rehabilitation, Shuang Ho Hospital, Taipei Medical University, No. 291 Jhongjheng Road, Jhonghe District, New Taipei City 235, Taiwan

Tel: +886-2-22490088 ext. 1603

Fax: +886-2-22480577

E-mail: 10462@s.tmu.edu.tw

*Keywords*: corticosteroid injection, carpal tunnel syndrome, systematic review, meta-analysis

**Appendix**

Keywords for search of different electronic databases

| Data base | Search terms for query |
| --- | --- |
| PubMed |  |
| #1 | “steroid” OR “steroids” OR” corticosteroid” OR “corticosteroids” OR “Betamethasone” OR “triamcinolone acetonide” OR “methylprednisolone” |
| #2 | “Carpal tunnel” OR “median nerve” OR “median neuropathy” OR “median neuropathies” OR “median neuritis” OR “CTS” OR “carpal tunnel syndrome [MeSH]” |
| #3 | “entrapment” OR “compress” OR “compressive” OR “focal” |
| #4 | “neuropathy” OR “neuropathies” OR “neuritis” |
| #5 | #3 AND #4 |
| #6 | #2 OR #5 |
| #7 | #1 AND #6 |
| #8 | #7 AND “randomized controlled trial” |

| Data base | Search terms for query |
| --- | --- |
| Excerpta Medica dataBASE (EMBASE) |  |
| #1 | “steroid” OR “steroids” OR” corticosteroid” OR “corticosteroids” OR “Betamethasone” OR “triamcinolone acetonide” OR “methylprednisolone” |
| #2 | “Carpal tunnel” OR “median nerve” OR “median neuropathy” OR “median neuropathies” OR “median neuritis” OR “CTS” OR “carpal tunnel syndrome [MeSH]” |
| #3 | “entrapment” OR “compress” OR “compressive” OR “focal” |
| #4 | “neuropathy” OR “neuropathies” OR “neuritis” |
| #5 | #3 AND #4 |
| #6 | #2 OR #5 |
| #7 | #1 AND #6 |
| #8 | #7 AND “randomized controlled trial” |

| Data base | Search terms for query |
| --- | --- |
| Cochrane library |  |
| #1 | “steroid” OR “steroids” OR” corticosteroid” OR “corticosteroids” OR “Betamethasone” OR “triamcinolone acetonide” OR “methylprednisolone” |
| #2 | “Carpal tunnel” OR “median nerve” OR “median neuropathy” OR “median neuropathies” OR “median neuritis” OR “CTS” OR “carpal tunnel syndrome” |
| #3 | “entrapment” OR “compress” OR “compressive” OR “focal” |
| #4 | “neuropathy” OR “neuropathies” OR “neuritis” |
| #5 | #3 AND #4 |
| #6 | #2 OR #5 |
| #7 | #1 AND #6 |
| #8 | #7 AND “randomized controlled trial” |
